# Supplementary material
Source: Springer Nature journal article supplement (https://www.springermedizin.de/resource/supplementary/12939_2008_123_MOESM2_ESM.pdf/9551530)

**Analysis of Gender and Sexually Diverse Health and Wellbeing Disparities:**

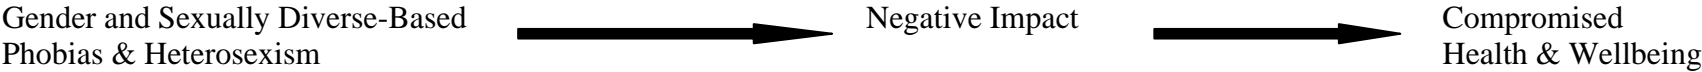

**Compounding Intersectional Impacts:**

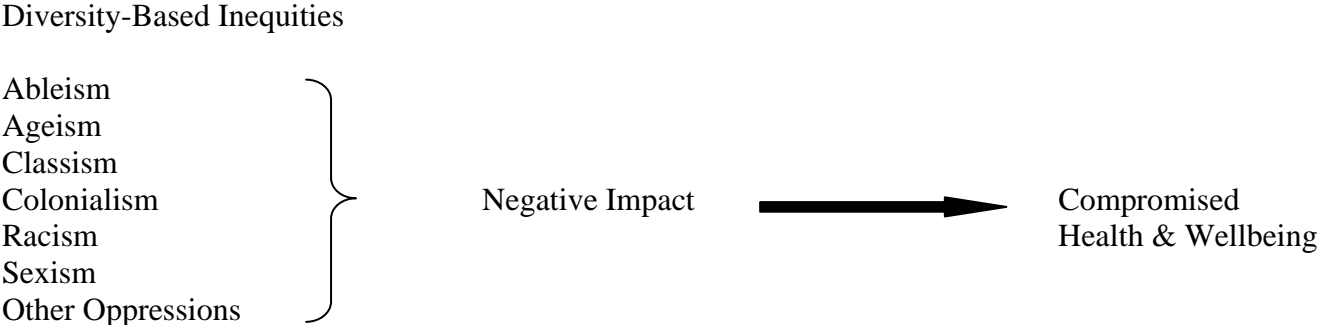

**Addressing Gender and Sexually Diverse Health and Wellbeing Disparities:**

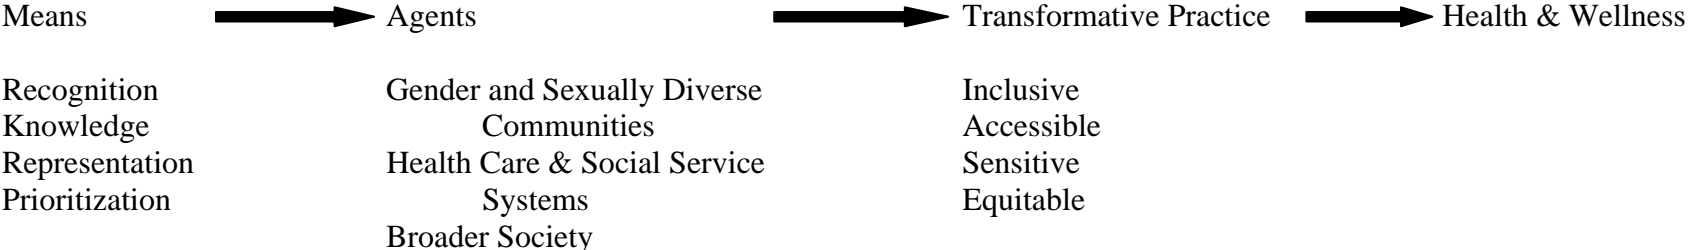

Supplement: MOESM2 [file 9551530]
